# Supplementary material for: Fruit Architecture in Polyamine-Rich Tomato Germplasm Is Determined via a Medley of Cell Cycle, Cell Expansion, and Fruit Shape Genes
Source: PubMed Central journal article supplement (PMC6843802; doi:10.3390/plants8100387), 2019-09-29
Supplement: plants-08-00387-s001.pdf [file plants-08-00387-s001.pdf]

```

WT      GGGAAAGTGAAGGAGAGTTTCGCGATAGTGAAGAAATCTCAGGACCCGTACGAA GATTTC
C4      GGGAAAGTGAAGGAGAGTTTCGCGATAGTGAAGAAATCTCAGGACCCGTACGAA GATTTC
C15     GGGAAAGTGAAGGAGAGTTTCGCGATAGTGAAGAAATCTCAGGACCCGTACGAA GATTTC
E88     GGGAAAGTGAAGGAGAGTTTCGCGATAGTGAAGAAATCTCAGGACCCGTACGAA GATTTC
Solyc02g085500.2.1 GGGAAAGTGAAGGAGAGTTTCGCGATAGTGAAGAAATCTCAGGACCCGTACGAA GATTTC
*****

WT      AGAGATCGATGATGGAAATGATTTTAGAGAAGGAAATGTTTGAGAAGAATGAGCTGGAACA
C4      AGAGATCGATGATGGAAATGATTTTAGAGAAGGAAATGTTTGAGAAGAATGAGCTGGAACA
C15     AGAGATCGATGATGGAAATGATTTTAGAGAAGGAAATGTTTGAGAAGAATGAGCTGGAACA
E88     AGAGATCGATGATGGAAATGATTTTAGAGAAGGAAATGTTTGAGAAGAATGAGCTGGAACA
Solyc02g085500.2.1 AGAGATCGATGATGGAAATGATTTTAGAGAAGGAAATGTTTGAGAAGAATGAGCTGGAACA
*****

WT      GCTTTTACAATGTTTCTGTCGTTGAACGGAAGCATTATCATGGAGTGATAGTTGAGGCG
C4      GCTTTTACAATGTTTCTGTCGTTGAACGGAAGCATTATCATGGAGTGATAGTTGAGGCG
C15     GCTTTTACAATGTTTCTGTCGTTGAACGGAAGCATTATCATGGAGTGATAGTTGAGGCG
E88     GCTTTTACAATGTTTCTGTCGTTGAACGGAAGCATTATCATGGAGTGATAGTTGAGGCG
Solyc02g085500.2.1 GCTTTTACAATGTTTCTGTCGTTGAACGGAAGCATTATCATGGAGTGATAGTTGAGGCG
*****

WT      TTCTCAGACATTTGGGAGACTTTGTTTTTAGGTAATAATGATAGAGTAAGGAGGATGTCAA
C4      TTCTCAGACATTTGGGAGACTTTGTTTTTAGGTAATAATGATAGAGTAAGGAGGATGTCAA
C15     TTCTCAGACATTTGGGAGACTTTGTTTTTAGGTAATAATGATAGAGTAAGGAGGATGTCAA
E88     TTCTCAGACATTTGGGAGACTTTGTTTTTAGGTAATAATGATAGAGTAAGGAGGATGTCAA
Solyc02g085500.2.1 TTCTCAGACATTTGGGAGACTTTGTTTTTAGGTAATAATGATAGAGTAAGGAGGATGTCAA
*****

WT      TTCATGAT
C4      TTCATGAT
C15     TTCATGAT
E88     TTCATGAT
Solyc02g085500.2.1 TTCATGAT
*****

```

**Figure S1:** Sequence alignment of *OVATE* gene in WT and transgenic fruits with its mutated version (*ovate*) containing stop codon (TAA). Multiple sequence alignment was generated using Clustal Omega (1.2.0). Three base pair mutation (T/GAA) in sequence in indicated in red box.

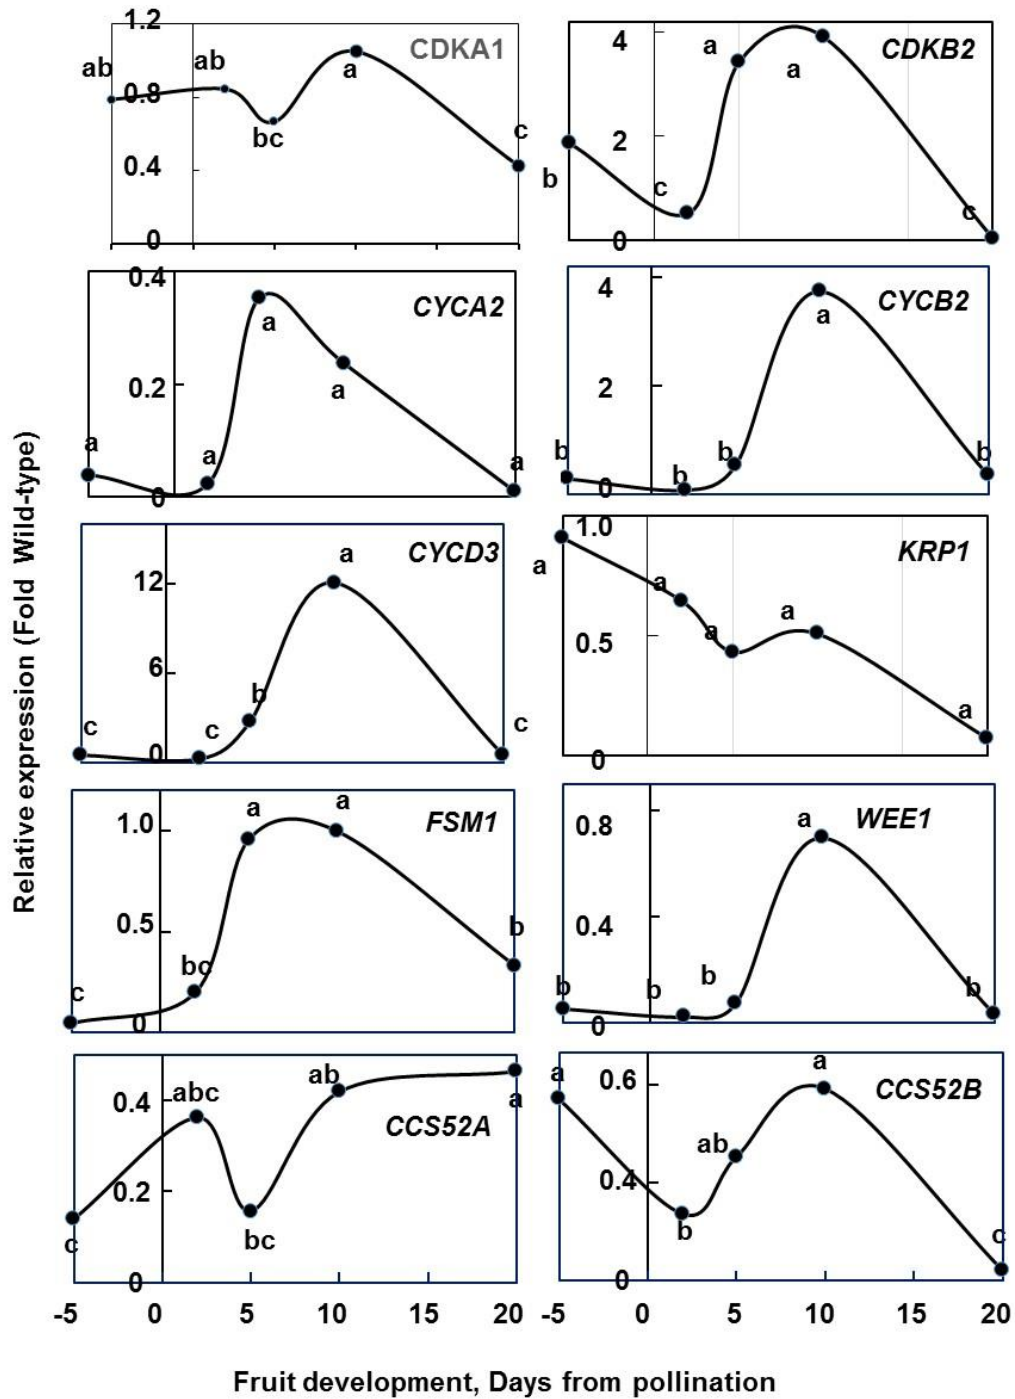

**Figure S2:** Expression patterns of various cell division and cell expansion genes in WT developing floral and ovary tomato tissues.

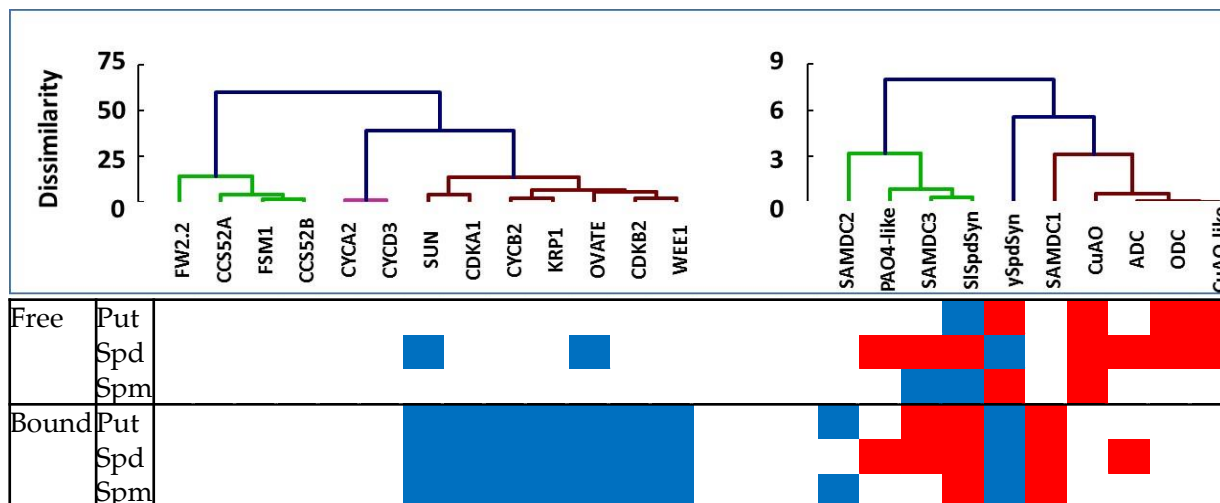

**Figure S3:** Correlation coefficient analysis of PA levels and transcripts of genes involved in fruit shape, cell cycle progression, cell expansion and polyamine biosynthesis and catabolism. Changes in gene expression and levels of different forms of various PAs were analyzed using XLSTAT version 2014.4.06 to determine the correlation and dendrogram (arrangement of the clusters among genes).

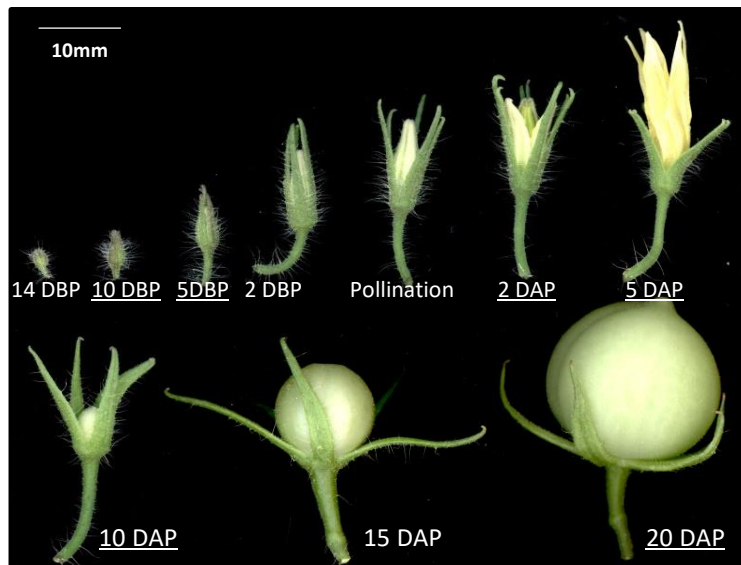

**Figure S4:** Representative flower and fruit developmental stages registered in *Solanum lycopersicum* cv. Ohio8245. Underlined flower and fruit samples at 10 and 5 days before pollination (DBP) and 2, 5, 10 and 20 days after pollination (DAP) were used in cytological, transcriptional and polyamine analyses.

**Table S1:** Steady state transcript levels of cell division, cell expansion, fruit shape and polyamine pathway genes at various developmental stages of floral and ovaries tissues in transgenic tomato line C15. Transcripts were quantified using qRT-PCR and relative expression levels were calculated by the  $2^{-\Delta\Delta C_T}$  method using *SlACTIN* (Solyc04g011500.2.1) as housekeeping gene and plotted as fold-respective WT tissues.

| Genes            | Tomato fruit development stages |       |        |        |        |
|------------------|---------------------------------|-------|--------|--------|--------|
|                  | 5 DBP                           | 2 DAP | 5 DAP  | 10 DAP | 20 DAP |
| <i>ySpdSyn</i>   | 188.5                           | 61.6  | 4971.4 | 135.7  | 116.6  |
| <i>SlSpdSyn</i>  | 0.9                             | 0.4   | 1.4    | 5.8    | 1.6    |
| <i>OVATE</i>     | 1.3                             | 9.6   | 4.4    | 0.5    | 2.7    |
| <i>SUN</i>       | 0.7                             | 6.7   | 5.2    | 2.3    | 0.8    |
| <i>FW2.2</i>     | 2.3                             | 0.4   | 1.7    | 0.0    | 0.8    |
| <i>CDKA1</i>     | 0.9                             | 1.5   | 1.8    | 0.6    | 1.3    |
| <i>CDKB2</i>     | 0.9                             | 9.2   | 1.0    | 0.3    | 1.7    |
| <i>CYCA2</i>     | 1.7                             | 0.9   | 0.6    | 4.0    | 0.9    |
| <i>CYCB2</i>     | 0.9                             | 15.3  | 2.0    | 0.8    | 0.9    |
| <i>CYCD3</i>     | 0.7                             | 1.7   | 1.1    | 3.1    | 0.4    |
| <i>KRP1</i>      | 1.0                             | 6.7   | 1.6    | 0.7    | 1.6    |
| <i>WEE1</i>      | 1.1                             |       | 0.9    | 8.9    | 1.3    |
| <i>FSM1</i>      | 1.1                             | 1.5   | 2.8    | 0.3    | 6.0    |
| <i>CCS52A</i>    | 1.3                             | 0.8   | 0.9    | 0.2    | 2.2    |
| <i>CCS52B</i>    | 1.2                             | 2.3   | 1.2    | 0.0    | 4.3    |
| <i>ODC</i>       |                                 | 0.28  |        |        |        |
| <i>ADC</i>       |                                 | 0.36  |        |        |        |
| <i>CuAO</i>      |                                 | 0.35  |        |        |        |
| <i>CuAO-like</i> |                                 | 0.58  |        |        |        |
| <i>PAO4-like</i> |                                 | 0.30  |        |        |        |
| <i>SAMDC1</i>    |                                 | 0.82  |        |        |        |
| <i>SAMDC2</i>    |                                 | 3.15  |        |        |        |
| <i>SAMDC3</i>    |                                 | 0.67  |        |        |        |

Abbreviations: DBP – days before pollination; DAP – days after pollination.

**Table S2:** Free and bound forms of putrescine, spermidine and spermine in floral buds and ovaries tissues at various developmental stages from wild-type (WT) and *35S:ySpdSyn* expressing transgenic tomato line C15. 

| Stage                       | 5 DBP |      | 2 DAP |      | 5 DAP |      | 10 DAP |      | 20 DAP |      |
|-----------------------------|-------|------|-------|------|-------|------|--------|------|--------|------|
|                             | WT    | C15  | WT    | C15  | WT    | C15  | WT     | C15  | WT     | C15  |
| Free putrescine             | 283   | 453  | 223   | 270  | 207   | 385  | 62     | 179  | 39     | 99   |
| Free spermidine             | 399   | 330  | 597   | 353  | 482   | 444  | 227    | 492  | 113    | 195  |
| Free spermine               | 67    | 177  | 267   | 363  | 201   | 471  | 53     | 227  | 15     | 25   |
| Bound putrescine            | 460   | 123  | 653   | 141  | 324   | 178  | 123    | 41   | 13     | 2    |
| Bound spermidine            | 571   | 127  | 876   | 51   | 362   | 74   | 41     | 20   | 5      | 7    |
| Bound spermine              | 1055  | 238  | 4463  | 526  | 1686  | 758  | 127    | 108  | 13     | 18   |
| Free total polyamines       | 749   | 959  | 1087  | 986  | 890   | 1299 | 342    | 898  | 167    | 319  |
| Conjugated total polyamines | 142   | 52   | 522   | 312  | 359   | 703  | 138    | 0    | 10     | 0    |
| Bound total polyamines      | 2086  | 487  | 5991  | 718  | 2372  | 1009 | 291    | 168  | 31     | 27   |
| Total polyamines            | 2978  | 1498 | 7601  | 2016 | 3621  | 2379 | 770    | 1386 | 208    | 1037 |

**Table S3:** List of genes and their primer sequences used for quantitative real-time PCR analyses.

| Gene ID            | Abbreviated Name   | Forward Primer (5' to 3')   | Reverse Primer (5' to 3') |
|--------------------|--------------------|-----------------------------|---------------------------|
| Solyc02g085500.2.1 | <i>OVATE</i> [2]   | GAGCTACCGGCAAGGTTATCG       | CACTATCGCGAAACTCTCCTTCA   |
| Solyc10g079240.1.1 | <i>SUN1</i>        | CAAACAGCACAGCGAAGCAA        | TGGCGCTGTCATACATTTAC      |
| Solyc02g090730.2.1 | <i>FW2.2</i>       | TTTGCTGGGATTGACAGGATT       | CAAGGTGCCTCTTCCAGATCA     |
| Solyc08g066330.1.1 | <i>CDKA1</i>       | ACTGCTTGGATCACGCCATT        | AACAGAGGCGGCTGATTCAC      |
| Solyc04g082840.2.1 | <i>CDKB2</i>       | AGTGACAAACCAAGCCCTCTTC      | CCCAGGCCAGAGTTCTTCATT     |
| Solyc06g065680.2.1 | <i>CYCA2</i>       | CCAAAAGACCAGCCCCAGAT        | CGCTTAGGCTGTTGAGAAGCA     |
| Solyc02g082820.2.1 | <i>CYCB2</i>       | AAGGCAGCAACAGGGAAACTAA      | GGCTCACACTTGGCTGCATA      |
| Solyc02g092980.2.1 | <i>CYCD3</i>       | AACATGATGAGCTTGCCACACT      | CCCCATTAAAGACCCATCTG      |
| Solyc09g091780.2.1 | <i>KRP1</i>        | GGAGAGCACACCTTGCAGTTT       | TACTCTGCCGTTGGCCTCAT      |
| Solyc09g074830.2.1 | <i>WEE1</i>        | GCCTCTTCTTCCGGGTCACT        | TGCAGAAGGACGACGTGTTG      |
| Solyc05g005710.2.1 | <i>SlSpdSyn</i>    | GGAGGAGGAGATGGTGGTGTCC      | GCAACTCCGTCACCAATGTGGAGAT |
| Solyc10g052470.1.1 | <i>FSM1</i>        | GGGATGTTTTCTTTATTGACAATGG   | CAGAGGTGGAATTATGGGATCCT   |
| Solyc08g080080.2.1 | <i>CCS52A</i> [60] | CTCTGACAGGTCATACATATAGA     | ACAATTGTCTGTCCATCTGGAG    |
| Solyc06g043150.2.1 | <i>CCS52B</i> [60] | TCCTGCAGCAGTGAAGGAC         | TCCTGCGTCTTCCTTGATT       |
| Solyc04g082030.1.1 | <i>ODC</i>         | TGCGAGCTTTTGCTTCGAAT        | GGTAATGCGCCGTATTTTGG      |
| Solyc10g054440.1.1 | <i>ADC</i>         | CTCGGCGGACTCCATAACC         | GCCCAGGGACTGCATAGGT       |
| Solyc08g079430.2.1 | <i>CuAO</i>        | CGATTTCCCAATCATCCTTT        | CCGCAATTGAATGAACGATTT     |
| Solyc05g013440.2.1 | <i>CuAO-like</i>   | CAATCGCACTGGGCAGTTAA        | CTCCTCAAGAATTTGCCTCTGA    |
| Solyc02g081390.2.1 | <i>PAO4-like</i>   | CCACTTCATATGCTTGC GGTTA     | TCGAGGTCACAAGCAAGTCTTC    |
| YPR069C            | <i>ySpdSyn</i>     | AGCCACCGAAAGGGATGAATTTGC    | ACATAACCAGGCTTCCTCAACGGA  |
| Solyc04g011500.2.1 | <i>Actin</i>       | TGG TCG TAC CAC CGGTAT TGTG | AATGGCATGTGGAAGGGCATA C   |
